# Supplementary material for: Human DNA levels in feces reflect gut inflammation and associate with presence of gut species in IBD patients across the age spectrum
Source: Research Square preprint supplement (doi:10.21203/rs.3.rs-6809327/v1), 2025-07-07
Supplement: Supplementary file 1 [file c9208b95be925bcff5aa923f.xlsx]

## Sheet: Supplementary Table 1 linear-mi
Supplementary Table 1: Linear mixed models, with estimates and significance (Signif. codes: 0 ‘***’ , 0.001 ‘**’ , 0.01 ‘*’ , 0.05 ‘.’ , 0.1 ‘ ’)
basic_SZ	lmer(FecalCalprotectin ~ Reads.Human.perc + Phenotype_sp + Age + (1 | subject) )
	Estimate	Pr(>|t|)
(Intercept)	345.9	0.0943	.
Reads.Human.perc	3.195	0.2646
Phenotype_spremission_CD	401.986	0.0156	*
Phenotype_spactive_CD	676.919	3.12e-05	***
Phenotype_spremission_UC	47.24	0.802
Phenotype_spactive_UC	410.337	0.0218	*
Age	-15.812	0.3118
R2	0.330338
basic_HO	lm(formula = FecalCalprotectin ~ Reads.Human.perc + Phenotype_sp + Age)
	Estimate	Pr(>|t|)
(Intercept)	60.3813	0.131
Reads.Human.perc	21.6406	< 2e-16	***
Phenotype_spremission_CD	214.254	9.28e-16	***
Phenotype_spactive_CD	201.434	1.19e-06	***
Phenotype_spremission_UC	164.236	9.75e-07	***
Phenotype_spactive_UC	259.791	5.86e-10	***
Age	0.0702	0.928
R2	0.2815
drugs.SZ	lmer(FecalCalprotectin ~ Reads.Human.perc + Phenotype_sp + treatment_advancement + Age + (1 | subject) )
	Estimate	Pr(>|t|)
(Intercept)	267.985	0.20096
Reads.Human.perc	5.502	0.04366	*
Phenotype_spremission_CD	991.543	1.67e-06	***
Phenotype_spactive_CD	1082.1	7.34e-09	***
Phenotype_spremission_UC	338.503	0.0907	.
Phenotype_spactive_UC	657.631	0.00025	***
treatment_advancement	-159.04	2.02e-05	***
Age	-10.763	0.48487
R2	0.532518
Calp.neu.SZ	lmer(FecalCalprotectin ~ neutrophils_perc_byHuman + Phenotype_sp + treatment_advancement + Age + (1 | subject) )
	Estimate	Pr(>|t|)
(Intercept)	282.326	0.193449
neutrophils_perc_byHuman	23.849	0.005901	**
Phenotype_spremission_CD	955.886	4.97e-06	***
Phenotype_spactive_CD	1049.42	5.51e-08	***
Phenotype_spremission_UC	310	0.160276
Phenotype_spactive_UC	482.194	0.013464	*
treatment_advancement	-132.935	0.000301	***
Age	-11.228	0.484984
R2	0.68192
Neu.calp.SZ	lmer(neutrophils_perc_byHuman ~ FecalCalprotectin + Phenotype_sp + treatment_advancement + Age + (1 | subject) )
	Estimate	Pr(>|t|)
(Intercept)	-1.53676	0.605305
FecalCalprotectin	0.005025	0.000128	***
Phenotype_spremission_CD	-4.86057	0.065409	.
Phenotype_spactive_CD	-4.34352	0.093451	.
Phenotype_spremission_UC	-1.02571	0.732629
Phenotype_spactive_UC	5.01004	0.047919	*
treatment_advancement	0.944407	0.029854	*
Age	0.086277	0.695386
R2	0.90153

## Sheet: Supplementary Table 2 species r
Supplementary Table 2: species ranking (Figure 3a)
species	median.rel_ab_asin.Control	median.rel_ab_asin.CD	median.rel_ab_asin.UC	median.rel_ab.Control	median.rel_ab.CD	median.rel_ab.UC	rank.Control	rank.CD	rank.UC	category
Eubacterium_rectale|t__SGB4933_group	0.169317	0.101662	0.119001	2.83958	1.03249	1.40945	1	4	5	IBD_lost
Blautia_wexlerae|t__SGB4837_group	0.160827	0.206245	0.16997	2.56436	4.19375	2.86128	2	1	1	CD_expanded
Collinsella_aerofaciens|t__SGB14546_group	0.128314	0.107792	0.129942	1.63742	1.15741	1.67902	3	3	4	CD_lost
Fusicatenibacter_saccharivorans|t__SGB4874	0.127136	0.118496	0.0927927	1.60767	1.39767	0.85858	4	2	8	IBD_lost
Bifidobacterium_adolescentis|t__SGB17244	0.12674	0	0.152559	1.59773	0	2.30942	5	52	2	CD_lost
Ruminococcus_bromii|t__SGB4285_group	0.126074	0	0	1.58154	0	0	6	52	84	IBD_lost
Candidatus_Cibiobacter_qucibialis|t__SGB15286	0.109798	0.00881685	0.0874182	1.20077	0.00778	0.76225	7	42	9	IBD_lost
Anaerobutyricum_hallii|t__SGB4532	0.106418	0.06619	0.076373	1.12821	0.437475	0.58215	8	11	14	IBD_lost
Dorea_longicatena|t__SGB4581	0.103725	0.0174752	0.0565288	1.07205	0.03057	0.31921	9	32	20	IBD_lost
Anaerostipes_hadrus|t__SGB4540_group	0.101301	0.0890304	0.0998085	1.02268	0.79055	0.99287	10	7	6	CD_lost
Bifidobacterium_longum|t__SGB17248	0.100039	0.0942595	0.147998	0.99748	0.885895	2.1744	11	6	3	UC_expanded
Coprococcus_comes|t__SGB4577_group	0.0942346	0.0539546	0.0773124	0.88539	0.291105	0.59653	12	13	12	IBD_lost
Ruminococcus_torques|t__SGB4563_group	0.0913508	0.013938	0.0311868	0.832185	0.02183	0.09723	13	35	34	IBD_lost
Blautia_massiliensis|t__SGB4826_group	0.0901323	0.0746592	0.0672638	0.810185	0.557155	0.45176	14	9	16	IBD_lost
Bacteroides_uniformis|t__SGB1836_group	0.0901063	0.0863437	0.0977306	0.80972	0.7437	0.95209	15	8	7	no_change
Alistipes_putredinis|t__SGB2318	0.0880925	0	0.0306332	0.774025	0	0.09381	16	52	35	IBD_lost
Blautia_faecis|t__SGB4820	0.0822391	0.0708638	0.0765089	0.674805	0.501435	0.58422	17	10	13	CD_lost
Gemmiger_formicilis|t__SGB15300	0.0802059	0	0	0.641925	0	0	18	52	84	IBD_lost
Faecalibacterium_prausnitzii|t__SGB15318_group	0.0800002	0	0.0761947	0.63864	0	0.57944	19	52	15	CD_lost
Oscillibacter_sp_ER4|t__SGB15254	0.0777925	0	0.0296438	0.60395	0	0.08785	20	52	38	IBD_lost
Roseburia_faecis|t__SGB4925	0.074249	0.0575386	0.0629032	0.55028	0.330705	0.39516	21	12	18	no_change
Faecalibacterium_SGB15346|t__SGB15346	0.0739663	0	0.0670502	0.546105	0	0.4489	22	52	17	CD_lost
Phocaeicola_vulgatus|t__SGB1814	0.0735518	0.101451	0.0872058	0.540025	1.0257	0.75856	23	5	10	CD_expanded
Lacrimispora_celerecrescens|t__SGB4868	0.071946	0	0.0381852	0.51673	0	0.14574	24	52	28	IBD_lost
Clostridiaceae_bacterium|t__SGB4269	0.0702413	0.0478014	0.0498473	0.492575	0.228335	0.24827	25	15	23	IBD_lost
Clostridiales_bacterium_KLE1615|t__SGB5090_group	0.0692025	0.0247176	0.0282491	0.478135	0.061085	0.07978	26	25	40	IBD_lost
Faecalibacterium_prausnitzii|t__SGB15342	0.0673989	0.022789	0.0855291	0.453575	0.051965	0.72974	27	26	11	UC_expanded
Blautia_obeum|t__SGB4811_group	0.065277	0.0376771	0.0545174	0.425505	0.1419	0.29692	28	18	22	IBD_lost
Dorea_formicigenerans|t__SGB4575	0.0650732	0.0454976	0.0599809	0.422855	0.20686	0.35934	29	16	19	CD_lost
Clostridia_bacterium|t__SGB14861	0.0645712	0	0.036098	0.416365	0	0.13025	30	52	30	IBD_lost
Faecalibacterium_prausnitzii|t__SGB15332_group	0.0624746	0	0.0449228	0.3898	0	0.20167	31	52	24	IBD_lost
Ruminococcus_bicirculans|t__SGB4262	0.0602898	0	0.0413216	0.36306	0	0.17065	32	52	26	CD_lost
Faecalibacterium_prausnitzii|t__SGB15316_group	0.0596217	0.0346666	0.0563067	0.355055	0.12015	0.31671	33	22	21	CD_lost
Coprococcus_catus|t__SGB4670	0.0576727	0	0.0398967	0.332245	0	0.15909	34	52	27	IBD_lost
Blautia_sp_MSK_20_85|t__SGB4828_group	0.0537849	0	0	0.28902	0	0	35	52	84	IBD_lost
Faecalicatena_fissicatena|t__SGB4871_group	0.0473098	0	0	0.223655	0	0	36	52	84	IBD_lost
GGB9758_SGB15368|t__SGB15368	0.0473082	0	0	0.223655	0	0	37	52	84	IBD_lost
GGB9635_SGB15106|t__SGB15106	0.0469074	0	0	0.219875	0	0	38	52	84	IBD_lost
Barnesiella_intestinihominis|t__SGB1965	0.0454689	0	0.0283869	0.2066	0	0.08056	39	52	39	IBD_lost
Agathobaculum_butyriciproducens|t__SGB14993_group	0.0452072	0.0374152	0.0445984	0.20423	0.139925	0.19877	40	19	25	CD_lost
Blautia_SGB4815|t__SGB4815_group	0.0448196	0.0107757	0.017083	0.200745	0.011635	0.02918	41	39	51	IBD_lost
Firmicutes_bacterium_AF16_15|t__SGB4993	0.0445192	0	0.0104692	0.198065	0	0.01096	42	52	68	IBD_lost
Ruminococcus_lactaris|t__SGB4557	0.0432847	0	0	0.18724	0	0	43	52	84	IBD_lost
Faecalibacterium_prausnitzii|t__SGB15317	0.0409912	0	0.00853825	0.167935	0	0.00729	44	52	73	IBD_lost
Dorea_longicatena|t__SGB4582_group	0.0409417	0	0	0.167555	0	0	45	52	84	IBD_lost
Roseburia_inulinivorans|t__SGB4940	0.0404837	0.020836	0.0315044	0.163805	0.04341	0.09922	46	28	32	IBD_lost
Eubacterium_ramulus|t__SGB4959	0.0397402	0	0.00366061	0.157845	0	0.00134	47	52	78	IBD_lost
Ruminococcaceae_bacterium|t__SGB15249	0.0395317	0	0	0.156195	0	0	48	52	84	IBD_lost
Lachnospira_eligens|t__SGB5082_group	0.0392953	0	0.0313548	0.154335	0	0.09828	49	52	33	IBD_lost
Clostridium_sp_AF34_10BH|t__SGB4914	0.0386481	0.0134271	0.0203705	0.1493	0.01803	0.04149	50	36	45	IBD_lost
Lachnospiraceae_bacterium|t__SGB4780	0.0374927	0	0.0188903	0.140505	0	0.03568	51	52	49	IBD_lost
Clostridium_sp_AF36_4|t__SGB4644	0.0367689	0	0	0.135135	0	0	52	52	84	IBD_lost
Lachnospiraceae_bacterium|t__SGB4781	0.0364793	0	0.0158846	0.133015	0	0.02523	53	52	54	IBD_lost
Alistipes_shahii|t__SGB2295	0.0360321	0	0	0.129775	0	0	54	52	84	IBD_lost
Clostridia_bacterium|t__SGB3957	0.0360119	0	0.00250998	0.12963	0	0.00063	55	52	81	IBD_lost
Dorea_sp_AF36_15AT|t__SGB4552_group	0.0360022	0	0.0276965	0.12956	0	0.07669	56	52	41	IBD_lost
Blautia_SGB4831|t__SGB4831_group	0.0357952	0	0.0192781	0.128075	0	0.03716	57	52	47	IBD_lost
GGB9730_SGB15291|t__SGB15291	0.035568	0	0	0.126455	0	0	58	52	84	IBD_lost
Parabacteroides_distasonis|t__SGB1934	0.034764	0.0347083	0.0345858	0.120805	0.12043	0.11957	59	21	31	no_change
Faecalibacillus_intestinalis|t__SGB6754	0.0333153	0	0.0123898	0.11095	0	0.01535	60	52	61	IBD_lost
Ruminococcaceae_unclassified_SGB15236|t__SGB15236	0.0330984	0	0	0.109515	0	0	61	52	84	IBD_lost
Phocaeicola_dorei|t__SGB1815	0.03302	0	0.00971097	0.109	0	0.00943	62	52	71	CD_lost
Ruminococcaceae_unclassified_SGB15265|t__SGB15265_group	0.032989	0	0	0.10879	0	0	63	52	84	IBD_lost
Parabacteroides_merdae|t__SGB1949	0.0328578	0	0.00974695	0.107925	0	0.0095	64	52	70	IBD_lost
Bacteroides_ovatus|t__SGB1871	0.0312052	0.0282895	0.0302767	0.09736	0.080105	0.09164	65	23	36	no_change
Bacteroides_caccae|t__SGB1877	0.030718	0	0.00554079	0.09433	0	0.00307	66	52	76	IBD_lost
Streptococcus_salivarius|t__SGB8007_group	0.0303946	0.0451524	0.0365691	0.092355	0.203735	0.13367	67	17	29	CD_expanded
Blautia_SGB4805|t__SGB4805	0.0301998	0	0	0.091175	0	0	68	52	84	IBD_lost
Blautia_sp_MSK_21_1|t__SGB4829	0.0301275	0	0	0.090765	0	0	69	52	84	IBD_lost
Lachnospiraceae_bacterium|t__SGB4964	0.0300736	0	0	0.090415	0	0	70	52	84	IBD_lost
GGB9615_SGB15053|t__SGB15053_group	0.0296995	0	0	0.08818	0	0	71	52	84	IBD_lost
Clostridia_bacterium|t__SGB15373	0.0293069	0	0	0.085865	0	0	72	52	84	IBD_lost
Dorea_sp_AF24_7LB|t__SGB4571	0.0283878	0	0	0.080565	0	0	73	52	84	IBD_lost
Lachnospiraceae_bacterium_WCA3_601_WT_6H|t__SGB4910	0.0278735	0	0	0.077675	0	0	74	52	84	IBD_lost
Eubacterium_ventriosum|t__SGB5045	0.0278621	0	0	0.077615	0	0	75	52	84	IBD_lost
Alistipes_communis|t__SGB2290	0.0277335	0	0.00627698	0.076895	0	0.00394	76	52	75	IBD_lost
Alistipes_onderdonkii|t__SGB2303	0.0263241	0	0.0126376	0.06928	0	0.01597	77	52	60	IBD_lost
GGB9602_SGB15031|t__SGB15031	0.0257691	0	0	0.06639	0	0	78	52	84	IBD_lost
Lachnospiraceae_bacterium|t__SGB4782	0.0254143	0	0	0.064575	0	0	79	52	84	IBD_lost
Adlercreutzia_equolifaciens|t__SGB14797_group	0.0251965	0	0.010941	0.063475	0	0.01197	80	52	65	IBD_lost
Lachnospiraceae_bacterium|t__SGB4832	0.024979	0	0	0.062385	0	0	81	52	84	IBD_lost
Odoribacter_splanchnicus|t__SGB1790	0.0246703	0.00450871	0.014762	0.06085	0.00206	0.02179	82	48	56	IBD_lost
Eubacterium_siraeum|t__SGB4198_group	0.0245381	0	0	0.0602	0	0	83	52	84	IBD_lost
GGB3570_SGB4777|t__SGB4777	0.0243538	0	0	0.0593	0	0	84	52	84	IBD_lost
Roseburia_hominis|t__SGB4936	0.0241519	0.00864155	0.0169949	0.05832	0.007475	0.02888	85	44	52	IBD_lost
Streptococcus_thermophilus|t__SGB8002	0.0233623	0.00866564	0.0105596	0.05457	0.00751	0.01115	86	43	66	CD_lost
Butyricicoccus_sp_AM29_23AC|t__SGB14991	0.0230704	0	0	0.053215	0	0	87	52	84	IBD_lost
Roseburia_intestinalis|t__SGB4951	0.0221133	0.0103265	0.0232249	0.048895	0.010715	0.05393	88	40	44	no_change
Akkermansia_muciniphila|t__SGB9226	0.021921	0	0	0.04813	0	0	89	52	84	IBD_lost
Romboutsia_timonensis|t__SGB6148	0.0214865	0	0.0258602	0.04616	0	0.06686	90	52	42	CD_lost
Clostridium_phoceensis|t__SGB15154	0.021258	0.00438748	0.0153792	0.045185	0.00194	0.02365	91	49	55	IBD_lost
Coprococcus_eutactus|t__SGB5117	0.0211279	0	0	0.044635	0	0	92	52	84	IBD_lost
GGB9522_SGB14921|t__SGB14921	0.0210954	0	0	0.044495	0	0	93	52	84	IBD_lost
Ruminococcaceae_unclassified_SGB15233|t__SGB15233	0.0208118	0	0	0.04331	0	0	94	52	84	IBD_lost
GGB51441_SGB71759|t__SGB71759	0.0200206	0	0	0.04008	0	0	95	52	84	IBD_lost
Eggerthellaceae_unclassified_SGB14322|t__SGB14322_group	0.0199652	0	0	0.03986	0	0	96	52	84	IBD_lost
Clostridium_sp_AM49_4BH|t__SGB4652	0.0198947	0	0	0.039575	0	0	97	52	84	IBD_lost
Ruminococcaceae_unclassified_SGB15234|t__SGB15234	0.0198646	0	0	0.039455	0	0	98	52	84	IBD_lost
Senegalimassilia_anaerobia|t__SGB14824_group	0.0196761	0	0	0.03871	0	0	99	52	84	IBD_lost
Bacteroides_thetaiotaomicron|t__SGB1861	0.0194289	0.014485	0.00236643	0.037745	0.020995	0.00056	100	34	82	UC_lost
Lachnospiraceae_bacterium|t__SGB4767	0.0191897	0	0	0.03682	0	0	101	52	84	IBD_lost
GGB9632_SGB15089|t__SGB15089	0.0184537	0	0.0135466	0.03405	0	0.01835	102	52	57	CD_lost
Mediterraneibacter_butyricigenes|t__SGB25493	0.0181104	0	0	0.032795	0	0	103	52	84	IBD_lost
GGB9707_SGB15229|t__SGB15229	0.0180384	0	0	0.032535	0	0	104	52	84	IBD_lost
Dysosmobacter_welbionis|t__SGB15078	0.0179216	0.0200812	0.0247088	0.032115	0.04032	0.06104	105	31	43	UC_expanded
GGB9705_SGB15224|t__SGB15224	0.0178881	0	0	0.031995	0	0	106	52	84	IBD_lost
GGB9699_SGB15216|t__SGB15216	0.0178768	0	0	0.031955	0	0	107	52	84	IBD_lost
Clostridia_bacterium|t__SGB14311	0.0177487	0	0	0.0315	0	0	108	52	84	IBD_lost
GGB3571_SGB4778|t__SGB4778	0.0176772	0	0	0.031245	0	0	109	52	84	IBD_lost
Blautia_sp_OF03_15BH|t__SGB4779	0.0161496	0	0	0.02608	0	0	110	52	84	IBD_lost
Ruthenibacterium_lactatiformans|t__SGB15271	0.0159035	0.0115457	0.0126494	0.02529	0.01333	0.016	111	38	59	CD_lost
Clostridium_fessum|t__SGB4705	0.0157819	0.0209884	0.00284605	0.024905	0.044045	0.00081	112	27	79	UC_lost
Ruminococcus_torques|t__SGB4608	0.0157206	0.0362688	0	0.024715	0.13149	0	113	20	84	CD_expanded
GGB9705_SGB15225|t__SGB15225	0.0151531	0	0	0.02296	0	0	114	52	84	IBD_lost
Anaerobutyricum_hallii|t__SGB4537	0.0150154	0	0	0.022545	0	0	115	52	84	IBD_lost
Eubacteriaceae_bacterium|t__SGB3958	0.014922	0	0	0.022265	0	0	116	52	84	IBD_lost
Lachnospira_pectinoschiza|t__SGB5075_group	0.0145899	0	0	0.021285	0	0	117	52	84	IBD_lost
Gemmiger_SGB15299|t__SGB15299	0.0141814	0	0	0.02011	0	0	118	52	84	IBD_lost
Clostridium_leptum|t__SGB14853	0.0140593	0.00111803	0.00176068	0.019765	0.00025	0.00031	119	51	83	IBD_lost
Alistipes_finegoldii|t__SGB2301	0.0132517	0	0	0.01756	0	0	120	52	84	IBD_lost
Bacteroides_xylanisolvens|t__SGB1867	0.0130675	0	0	0.017075	0	0	121	52	84	IBD_lost
GGB3746_SGB5089|t__SGB5089	0.0124059	0	0.00512838	0.01539	0	0.00263	122	52	77	CD_lost
Ruminococcaceae_bacterium|t__SGB14899	0.011946	0	0	0.01427	0	0	123	52	84	IBD_lost
Streptococcus_parasanguinis|t__SGB8071	0.0114436	0.0203395	0.0169123	0.013095	0.04138	0.0286	124	29	53	IBD_expanded
GGB2977_SGB3959|t__SGB3959	0.0113217	0	0	0.01282	0	0	125	52	84	IBD_lost
Clostridiaceae_bacterium_OM08_6BH|t__SGB4768	0.0112163	0	0	0.01258	0	0	126	52	84	IBD_lost
Roseburia_sp_AF02_12|t__SGB4938	0.0106654	0	0	0.011375	0	0	127	52	84	IBD_lost
Ruminococcaceae_bacterium|t__SGB15356	0.0104428	0	0	0.010905	0	0	128	52	84	IBD_lost
Candidatus_Avimicrobium_caecorum|t__SGB15350	0.0102127	0	0.00987437	0.01043	0	0.00975	129	52	69	CD_lost
Paraprevotella_clara|t__SGB1798	0.00973915	0	0	0.009485	0	0	130	52	84	IBD_lost
Alistipes_ihumii|t__SGB2328	0.00969035	0	0	0.00939	0	0	131	52	84	IBD_lost
Clostridium_sp_AM22_11AC|t__SGB4749	0.0095866	0	0	0.00919	0	0	132	52	84	UC_lost
Anaeromassilibacillus_sp_An250|t__SGB14894	0.00928984	0	0.0135245	0.00863	0	0.01829	133	52	58	UC_expanded
Clostridia_bacterium|t__SGB3574	0.00909397	0	0.011883	0.00827	0	0.01412	134	52	64	CD_lost
GGB45432_SGB63101|t__SGB63101	0.00899173	0	0	0.008085	0	0	135	52	84	IBD_lost
GGB9634_SGB15093|t__SGB15093	0.00890097	0	0	0.00796	0	0	136	52	84	IBD_lost
Eubacterium_sp_AF15_50|t__SGB5042	0.00887701	0	0	0.00788	0	0	137	52	84	IBD_lost
GGB9787_SGB15410|t__SGB15410	0.00878927	0	0	0.007725	0	0	138	52	84	IBD_lost
Lachnospira_sp_NSJ_43|t__SGB5087	0.00874929	0	0	0.007655	0	0	139	52	84	IBD_lost
Blautia_glucerasea|t__SGB4816	0.00854642	0	0	0.007305	0	0	140	52	84	IBD_lost
Intestinibacter_bartlettii|t__SGB6140	0.00852595	0.00885354	0.0105453	0.00727	0.00784	0.01112	141	41	67	no_change
Lachnospiraceae_bacterium_NSJ_29|t__SGB25431	0.00828562	0	0	0.006865	0	0	142	52	84	IBD_lost
GGB3478_SGB4643|t__SGB4643	0.00827348	0	0	0.006845	0	0	143	52	84	IBD_lost
Clostridiaceae_bacterium|t__SGB4770	0.00779103	0	0	0.00607	0	0	144	52	84	IBD_lost
Lachnospiraceae_bacterium|t__SGB4750	0.00776175	0.00713779	0	0.006025	0.005095	0	145	45	84	UC_lost
Bilophila_wadsworthia|t__SGB15452	0.00769419	0	0	0.00592	0	0	146	52	84	UC_lost
Clostridium_sp_NSJ_42|t__SGB6174_group	0.00755052	0	0	0.005705	0	0	147	52	84	IBD_lost
Anaerotignum_faecicola|t__SGB5190	0.00750673	0	0	0.005635	0	0	148	52	84	IBD_lost
Eubacteriaceae_bacterium|t__SGB4546	0.00746331	0	0	0.00557	0	0	149	52	84	IBD_lost
GGB9712_SGB15244|t__SGB15244	0.00693659	0	0	0.00484	0	0	150	52	84	IBD_lost
Alistipes_senegalensis|t__SGB2296	0.00632058	0	0	0.003995	0	0	151	52	84	IBD_lost
Ruminococcaceae_unclassified_SGB4191|t__SGB4191	0.0060866	0	0	0.003705	0	0	152	52	84	IBD_lost
Lacrimispora_amygdalina|t__SGB4716	0.00577059	0.00655649	0.0118915	0.00333	0.0043	0.01414	153	46	63	UC_expanded
GGB9627_SGB15081|t__SGB15081	0.00574427	0	0	0.0033	0	0	154	52	84	IBD_lost
Massilioclostridium_coli|t__SGB29305	0.00543141	0	0	0.00295	0	0	155	52	84	IBD_lost
Clostridia_bacterium|t__SGB15374	0.00529396	0	0	0.002805	0	0	156	52	84	IBD_lost
Clostridia_bacterium|t__SGB14252	0.00470625	0	0	0.002215	0	0	157	52	84	IBD_lost
Clostridiaceae_unclassified_SGB4769|t__SGB4769	0.00458247	0	0	0.0021	0	0	158	52	84	IBD_lost
Eubacterium_ramulus|t__SGB4960	0.00441566	0	0	0.00195	0	0	159	52	84	IBD_lost
Alistipes_indistinctus|t__SGB2325	0.00418877	0	0	0.001755	0	0	160	52	84	IBD_lost
GGB9614_SGB15049|t__SGB15049	0.00386648	0	0	0.001495	0	0	161	52	84	IBD_lost
Blautia_obeum|t__SGB4809	0.00368693	0	0	0.00136	0	0	162	52	84	IBD_lost
Clostridium_sp_AM33_3|t__SGB4711	0.00339757	0	0	0.001155	0	0	163	52	84	IBD_lost
Lachnospiraceae_bacterium|t__SGB4771	0.0033676	0	0	0.001135	0	0	164	52	84	IBD_lost
GGB9559_SGB14969|t__SGB14969	0.00305751	0	0	0.000945	0	0	165	52	84	IBD_lost
GGB9494_SGB14891|t__SGB14891	0.00280143	0	0	0.000785	0	0	166	52	84	CD_lost
Lachnospiraceae_bacterium|t__SGB4909	0.0028011	0	0	0.00079	0	0	167	52	84	IBD_lost
Dysosmobacter_sp_NSJ_60|t__SGB15124	0.00257831	0	0	0.000665	0	0	168	52	84	CD_lost
GGB9557_SGB14966|t__SGB14966	0.00246907	0	0	0.00061	0	0	169	52	84	IBD_lost
Clostridia_bacterium|t__SGB15413	0.00245713	0	0	0.000605	0	0	170	52	84	IBD_lost
Christensenellaceae_bacterium|t__SGB14127	0.00185737	0	0	0.000345	0	0	171	52	84	IBD_lost
Ruminococcaceae_bacterium|t__SGB15272	0.00185698	0	0	0.000345	0	0	172	52	84	IBD_lost
Clostridia_bacterium|t__SGB15382	0.00180272	0	0	0.000325	0	0	173	52	84	IBD_lost
Clostridiales_bacterium_NSJ_40|t__SGB72336	0.00180272	0	0	0.000325	0	0	173	52	84	IBD_lost
Clostridia_bacterium|t__SGB14253	0.00177342	0	0	0.000315	0	0	174	52	84	IBD_lost
Lachnospiraceae_bacterium|t__SGB4706	0.00172818	0	0	0.0003	0	0	175	52	84	IBD_lost
Clostridiales_bacterium|t__SGB15143	0.00109449	0	0	0.00012	0	0	176	52	84	CD_lost
Clostridia_bacterium|t__SGB14854	0	0	0.00698576	0	0	0.00488	177	52	74	UC_expanded
Clostridia_unclassified_SGB14844|t__SGB14844	0	0	0.0176248	0	0	0.03106	177	52	50	UC_expanded
Clostridia_unclassified_SGB4121|t__SGB4121	0	0.0123615	0.0199663	0	0.01528	0.03986	177	37	46	UC_expanded
Clostridium_innocuum|t__SGB4037_group	0	0.00586066	0	0	0.003435	0	177	47	84	IBD_expanded
Dialister_invisus|t__SGB5825_group	0	0	0.0302321	0	0	0.09137	177	52	37	UC_expanded
Eggerthella_lenta|t__SGB14809	0	0.0173684	0.0123575	0	0.030165	0.01527	177	33	62	IBD_expanded
Enterocloster_bolteae|t__SGB4758_group	0	0.0031899	0	0	0.00102	0	177	50	84	IBD_expanded
Escherichia_coli|t__SGB10068	0	0.0201047	0	0	0.04042	0	177	30	84	IBD_expanded
Flavonifractor_plautii|t__SGB15132	0	0.0264678	0.0192106	0	0.07004	0.0369	177	24	48	IBD_expanded
GGB9619_SGB15067|t__SGB15067	0	0	0.00273862	0	0	0.00075	177	52	80	UC_expanded
Ruminococcus_gnavus|t__SGB4584	0	0.0533317	0.00928991	0	0.28416	0.00863	177	14	72	IBD_expanded

## Sheet: Supplementary Table 3 SZ cohort
label	type_id	collection_date	age_visit	FecalCalprotectin	severity	Reads.Human.perc	neutrophils_perc_byHuman	colon_perc_byHuman	intestine_perc_byHuman	monocytes_perc_byHuman	B_cells_perc_byHuman	T_cells_perc_byHuman
GB_366_1	CD_366_1	2022	15	172.5	remission	1.07	NA	NA	NA	NA	NA	NA
GB_543_2	CD_543_2	2024	12	158	none	0.15	NA	NA	NA	NA	NA	NA
GB_554_1	Control_554_1	2023	10	259	none	0.02	NA	NA	NA	NA	NA	NA
GB_562_1	Control_562_1	2023	9	453.4	none	0	NA	NA	NA	NA	NA	NA
GB_513_2	UC_513_2	2022	18	894.5	remission	3.56	NA	NA	NA	NA	NA	NA
GB_288_1	UC_288_1	2022	18	123.85	mild	6.89	5.33085	0.0755759	0.00949304	0.239099	0.0330256	0.042938
GB_333_1	UC_333_1	2022	5	349.5	remission	0.02	0.338332	1.06461	0.0291675	NA	0	0
GB_365_1	UC_365_1	2022	17	204.3	mild	88.52	27.6731	3.8687	0.315191	1.53498	0.116345	0.110881
GB_369_1	CD_369_1	2021	15	3.408	remission	0.07	0.446859	0.291518	0.00364765	0.0565024	0	0.00103605
GB_398_1	CD_398_1	2022	18	38.55	remission	0.02	0.0215994	1.10078	0	0	0	0.870012
GB_403_1	CD_403_1	2021	15	110.815	remission	0.01	0.416285	0.212043	0.000388453	0.0230907	0.00175018	0.00166798
GB_433_1	UC_433_1	2022	17	282.15	mild	12.93	6.0485	0.0421978	0.010327	0.279191	0.0668546	0.209866
GB_436_1	UC_436_1	2022	19	98.82	remission	0.48	0.660508	0.048222	0.00229309	0.0531652	0.00194052	0.00353425
GB_446_1	UC_446_1	2022	18	2100	moderate	75.33	28.0813	0.148173	0.0242604	4.11021	0.129255	0.100753
GB_448_1	CD_448_1	2021	11	1827	mild	0.01	0.176864	0.427842	0.0747672	NA	NA	NA
GB_455_1	UC_455_1	2022	11	52.06	remission	0.05	0.168181	0.610213	0.129795	0	0	NA
GB_456_1	Control_456_1	2021	17	320.2	none	0.25	0.600959	0.135868	0.00342184	0.0661477	0.0125652	0.0181323
GB_460_1	Control_460_1	2021	11	70.86	none	0.01	0.128349	0.568263	0.289106	0	0	NA
GB_462_1	CD_462_1	2022	13	2100	mild	0.05	0.581745	0.125361	0.0167788	0	0	0
GB_465_1	Control_465_1	2021	13	92.915	none	0.03	0.371787	0.26661	0.0568556	NA	0.00103733	0
GB_466_1	Control_466_1	2022	7	303.85	none	0.07	0.174405	0.291676	0.0181605	0.00170072	0.0104443	0
GB_467_1	UC_467_1	2021	16	600.75	moderate	1.43	1.03294	0.0837113	0.0018392	0.0735109	0.00724322	0.00446177
GB_467_2	UC_467_2	2022	17	50.96	remission	0.13	NA	0.995341	0.0424782	NA	NA	NA
GB_472_1	UC_472_1	2022	16	573	moderate	53.4	20.6194	0.378139	0.0301378	0.937378	0.107783	0.194877
GB_473_1	UC_473_1	2022	15	149	mild	3.78	3.06911	0.0234314	0.00424492	0.185803	0.024282	0.0249853
GB_478_1	Control_478_1	2022	14	6.552	none	0.01	NA	0.855474	0.0210602	NA	NA	NA
GB_479_1	CD_479_1	2022	6	2100	moderate	1.66	0.90157	0.0428109	0.00473616	0.0747147	0.00510863	0.00260609
GB_480_1	UC_480_1	2022	15	2100	moderate	78.68	19.5195	0.0824965	0.0489195	2.89299	0.154224	0.103561
GB_482_1	CD_482_1	2022	7	2100	moderate	53.64	18.8817	0.150958	0.0366359	0.781899	0.023893	0.182866
GB_483_1	CD_483_1	2022	15	2100	moderate	2.19	1.96868	NA	NA	0.0681794	0.00557529	0.0167106
GB_486_1	Control_486_1	2022	16	25.55	none	0.03	0.0623038	0.795508	0.043223	0	0	0.193353
GB_487_1	Control_487_1	2022	14	26.1	none	0.03	0.0592069	0.22617	0.0334286	0	0	NA
GB_491_1	UC_491_1	2022	15	2100	moderate	2.78	1.72056	0.0164933	0.0024509	0.0276505	0.0040192	0.00311942
GB_492_1	UC_492_1	2022	15	608.7	moderate	5.3	2.00458	0.0200446	0.00141963	0.07478	0.0138069	0.00662857
GB_442_1	UC_442_1	2022	11	2100	mild	44.99	22.7358	0.0371049	0.0995169	1.23463	0.189987	0.0512514
GB_496_1	UC_496_1	2022	16	750.7	mild	0.02	39.8132	0.0475333	0.0236407	2.79491	0.200358	0.241011
GB_498_1	UC_498_1	2022	16	2100	severe	0.01	13.0871	0.189322	0.00992458	0.828695	0.0455936	0.0580033
GB_499_1	CD_499_1	2022	15	2100	severe	0.05	26.6799	0.0991138	0.0340753	0.929308	0.0802342	0.232696
GB_433_2	UC_433_2	2022	17	2001	moderate	0.01	20.6721	0.083862	0.00520094	0.798054	0.0980238	0.124512
GB_493_1	Control_493_1	2022	13	50.1	none	0.29	0.441302	0.17483	0	0.090859	0.0208423	NA
GB_403_2	CD_403_2	2022	16	24.51	remission	0.02	0.976164	0.714129	0	NA	0.188156	NA
GB_500_1	UC_500_1	2022	17	47.94	mild	0.02	0.952007	0.345911	NA	NA	0.0610069	NA
GB_501_1	CD_501_1	2022	13	1249	moderate	9.17	0.465158	0.48218	0.000111039	0.0492302	0.00416148	0.0218408
GB_479_2	CD_479_2	2022	6	1164	mild	1.35	1.3507	0.203075	0	0.823924	0.570698	NA
GB_508_1	Control_508_1	2022	5	301.9	none	2.66	0.859396	0	NA	0.221416	0.173244	0.391622
GB_509_1	Control_509_1	2022	11	48.54	none	0.02	0.192655	0.00472204	NA	NA	0.00660253	0
GB_506_1	CD_506_1	2022	13	1126	mild	6.45	4.28871	0.0819058	4.56065e-05	0.254569	0.00495952	0.00257277
GB_504_1	CD_504_1	2022	10	NA	severe	0.04	0.275725	0.00543862	4.77251e-06	0.0210725	0.00136597	0.00113982
GB_505_1	CD_505_1	2022	14	460.1	severe	14.96	2.18518	0.00918303	0.00127675	0.190556	0.063559	0.0338514
GB_439_1	UC_439_1	2022	19	15.97	mild	0.43	0.290446	0.450545	NA	0	0.0767979	0.0655093
GB_513_1	UC_513_1	2022	18	2018	moderate	1.77	3.13758	0.08068	0.00166536	0.319321	0.0319815	0.0331385
GB_511_1	CD_511_1	2022	7	NA	moderate	0.02	0.327258	0.0638059	0	NA	0.048373	0.0157699
GB_514_1	CD_514_1	2022	15	2095	severe	0.1	10.3862	0.030629	0.010257	0.696165	0.0136741	0.0756998
GB_507_1	CD_507_1	2022	13	NA	severe	0.01	1.24935	0.232036	NA	0.0785621	0	0.0202579
GB_414_1	CD_414_1	2022	12	1794	remission	53.24	1.4665	NA	NA	0.0237428	0.00809763	0.00732701
GB_510_1	Control_510_1	2022	10	31.03	none	38.36	0.642165	0.08582	0.085928	0.236782	0.199713	0.119642
GB_489_1	CD_489_1	2022	17	2100	moderate	2.57	0.217696	0.15206	0.023196	0.116277	0.00114079	0.0508398
GB_483_2	CD_483_2	2022	15	1436	remission	0.41	0.156353	0.0942185	0.00535559	0.00760737	0.00127289	0.00288693
GB_455_2	UC_455_2	2022	11	31.96	remission	0.04	0.0321967	0.088075	0.016354	0.0334767	0.00273914	0
GB_516_1	Control_516_1	2022	16	137.8	none	0.03	0.0191337	0.0561775	0.000112436	0	0.0113226	0
GB_517_1	Control_517_1	2022	16	48.51	none	0.01	0.227054	0.102731	0.0533158	0	0.000609121	0
GB_462_2	CD_462_2	2022	13	2100	mild	0.26	0.151419	0.0799503	0.00212903	0.0069006	0.00284356	0.00365115
GB_482_2	CD_482_2	2022	7	719.5	mild	16.85	2.30954	0.989819	0.0500621	0.108265	0.0216815	0.0346314
GB_288_2	UC_288_2	2022	18	2100	mild	11.01	3.67073	0.101289	0.0115355	0.214339	0.0126426	0.0473629
GB_521_1	CD_521_1	2022	14	737.9	remission	0.03	0.362919	0.108138	0.0241407	0	0	0.0852389
GB_501_2	CD_501_2	2022	13	267.1	mild	0.01	0	0.0765816	0	0	0	0
GB_520_1	Control_520_1	2022	16	1105	none	0.23	0.139131	0.082368	0	0.0132501	0.0117112	0.00253923
GB_491_2	UC_491_2	2022	15	361.5	remission	0.05	0.140752	0.0254801	0.00323802	0.00926122	0	0
GB_497_1	UC_497_1	2022	14	2100	mild	75.08	14.1841	0.159046	0.02426	0.450257	0.123809	0.0331856
GB_519_1	CD_519_1	2022	16	299.3	mild	0.34	0.0628051	0.149855	0.00590587	9.55968e-05	0.0027609	0
GB_522_1	UC_522_1	2022	17	569.2	mild	0.08	0.164946	0.121588	0.00240359	0.0272809	0	0.0107457
GB_492_2	UC_492_2	2022	15	544.9	severe	96.4	7.94374	0.477977	0.0331879	0.497252	0.0358004	0.133291
GB_505_2	CD_505_2	2022	14	323.2	mild	27.92	2.24426	0.00954826	0.00127918	0.0992129	0.00292738	0.00430229
GB_375_1	UC_375_1	2022	13	209.9	remission	7.65	8.05296	0.192958	0.0256848	0.471755	0.0722841	0.0472885
GB_524_1	CD_524_1	2022	11	1496	mild	0.05	0.213286	0.03826	0	NA	0.000243443	NA
GB_523_1	CD_523_1	2022	17	224.3	remission	0.02	0.0499267	0.265194	0.00811588	NA	NA	NA
GB_506_2	CD_506_2	2022	13	574.5	mild	0.07	0.33955	0.0910829	0.000127086	NA	0	NA
GB_474_2	CD_474_2	2023	16	99.2	remission	0.01	0.63961	0.0439001	0.00137737	0.0775717	0.00379743	0.0015233
GB_426_1	UC_426_1	2023	13	319.9	remission	4.37	2.13525	0.0326635	0.00601612	0.222061	0.00501563	0.00160427
GB_527_1	UC_527_1	2023	16	102.1	mild	0.12	0.253903	0.0276342	0.000879467	NA	4.81869e-05	0
GB_525_1	Control_525_1	2023	11	78.18	none	0.02	0.0610156	0.310615	0.000654762	NA	NA	NA
GB_532_1	UC_532_1	2023	16	1557	moderate	83.01	32.444	0.450578	0.0512165	0.635097	0.134596	0.0900098
GB_524_2	CD_524_2	2023	12	69.31	remission	0.06	0.0375858	0.420732	0.0413782	NA	NA	NA
GB_519_2	CD_519_2	2023	17	183.5	remission	0.03	0	0	0	NA	0	0
GB_448_2	CD_448_2	2023	13	404.3	severe	0.01	NA	0.116278	0	NA	NA	NA
GB_538_1	CD_538_1	2023	13	2100	remission	0.3	0.263891	0.107057	0.010687	NA	0.000298491	0.00097195
GB_536_1	CD_536_1	2023	10	1842	severe	37.56	11.6909	0.250155	0.0303843	0.96565	0.0347032	0.100844
GB_537_1	UC_537_1	2023	14	83.3	none	0.01	0.143681	0.216322	0	NA	0.00187424	NA
GB_539_1	CD_539_1	2023	17	1638	severe	0.07	0.308802	0.0995165	0.0248368	NA	0.0059775	0.0519809
GB_527_2	UC_527_2	2023	17	104	moderate	0.65	0.638135	0.032263	0.00208294	0.0519749	0.00750954	0.00468764
GB_543_1	CD_543_1	2023	11	965.3	none	3.96	1.56943	1.71167	0.0911067	0.124105	0.03243	0.0179209
GB_536_2	CD_536_2	2023	10	2100	remission	90.3	46.7348	0.329104	0.0834735	4.15894	0.115015	0.190242
GB_557_1	Control_557_1	2023	4	282.9	none	0.28	0.011597	0.0376828	0.00123777	0	0.000473118	0.0021008
GB_555_1	Control_555_1	2023	10	173.5	none	0.02	0.238195	0.247443	0	NA	NA	NA
GB_556_1	Control_556_1	2023	6	363.2	none	0.53	0.565568	0.0711578	0.00285028	0.0361369	0	0
GB_483_3	CD_483_3	2023	16	309.2	mild	0.73	0.558299	0.0409549	0.0166527	0.00950721	0.00698711	0.0017001
GB_553_1	Control_553_1	2023	17	99.66	none	0.07	0.181668	0.138569	5.53016e-05	NA	0	0
GB_552_1	Control_552_1	2023	3	121.9	none	0.11	0.228152	0.189524	0.0164378	0	0	0.0390992
GB_559_1	Control_559_1	2023	11	22.34	none	0.11	0.0795224	0.266456	0.025415	0	0.000291176	0
GB_288_3	UC_288_3	2023	19	369.4	mild	34.3	10.3071	0.277035	0.0320556	0.563967	0.149188	0.133808
GB_482_3	CD_482_3	2023	8	606.2	remission	0.72	0.312339	0.294773	0.0078318	0.00893291	0.00346328	0
GB_550_1	Control_550_1	2023	0	47.15	none	0.08	0.0705948	0.303457	0.0540874	0.0178924	0.0171498	0.0768132
GB_298_1	UC_298_1	2022	17	9.618	remission	77.01	NA	0.0658462	0.0276595	NA	NA	NA
GB_395_1	CD_395_1	2023	17	NA	remission	0.02	0.0736138	0.190664	0	0	0.000848571	0.0696094
GB_403_3	CD_403_3	2024	18	NA	none	0.02	0.0163389	0.0342521	0	0.0106168	0	0
GB_457_1	Control_457_1	2021	16	51.805	none	0.01	0.42285	NA	NA	NA	0.191505	NA
GB_474_1	CD_474_1	2022	16	319.3	mild	0.06	0.527115	0.0413464	0	NA	NA	0
GB_497_2	UC_497_2	2023	15	2100	moderate	95.78	40.6802	1.27851	0.0925101	1.90935	0.376836	0.461527
GB_497_3	UC_497_3	2024	16	124.7	remission	0.27	0.264684	0.0279104	0.0266137	NA	NA	NA
GB_501_3	CD_501_3	2023	14	118.7	remission	0.07	0.741408	0.0136061	0	0.0903117	0.000367983	0
GB_505_3	CD_505_3	2023	15	211	moderate	12.59	9.39384	0.0424511	0.00727877	0.541263	0.030624	0.0275491
GB_519_3	CD_519_3	2023	17	70.98	remission	0.02	0.393682	0.324474	0.047125	0.0108012	0.039248	0.00406238
GB_528_1	CD_528_1	2023	13	1536	remission	1.93	1.09924	0.0315541	0.00241441	0.0471674	0.00173769	0.0176592
GB_540_1	UC_540_1	2023	9	2100	moderate	96.31	42.2867	1.12216	0.0631205	7.4585	0.23149	0.359915
GB_542_1	CD_542_1	2023	17	2100	mild	7.99	7.06235	1.70584	0.0686142	0.574686	0.0176563	0.138608
GB_546_1	UC_546_1	2023	13	61.79	severe	0.02	0.333377	0.0608872	0.0568633	0.0148993	0.000255072	0.00292344
GB_546_2	UC_546_2	2024	14	230.1	mild	5.65	5.96283	1.10347	0.00830503	0.157377	0.0435057	0.0377905
GB_551_1	CD_551_1	2024	17	35.79	mild	0.03	0.0752571	0.371533	0.00288269	0.000408607	0	0.0267425
GB_560_1	CD_560_1	2024	7	NA	remission	0.4	0.731787	0.168104	0	0.0505551	0.00535094	0.00253403
GB_561_1	CD_561_1	2023	13	2100	severe	0.06	NA	NA	NA	NA	NA	NA
GB_567_1	CD_567_1	2023	16	1953	remission	0.26	0.327848	0.0456426	0.00655172	0.0136358	0.00291182	0
GB_572_1	Control_572_1	2023	17	13.45	none	0	0.163284	0.322111	0	NA	0	0.117562
GB_573_1	Control_573_1	2023	15	NA	none	0.03	NA	0.587527	0.0448288	NA	NA	NA
GB_575_1	UC_575_1	2024	16	1142	mild	0.14	0.374368	0.00805334	0.0217291	0.0376499	0.00403183	0.00991322
GB_576_1	CD_576_1	2023	11	192.3	remission	0.14	0.111037	0.200142	0	0.000308413	0.0125576	0.0352603
GB_576_2	CD_576_2	2024	12	104	remission	0.01	NA	0.127731	0.000812047	NA	NA	NA
GB_577_1	CD_577_1	2023	15	220.6	mild	7.75	3.88644	3.58746	0.0546261	0.237058	0.00567595	0.0814068
GB_580_1	UC_580_1	2024	17	30.74	remission	0	0.0770221	2.55259	NA	NA	NA	NA
GB_586_1	CD_586_1	2024	18	NA	mild	0.02	0.311043	0.130656	0	NA	0	0.0015921
GB_593_1	Control_593_1	2024	17	41.93	none	0.51	0.246827	0.287251	0.0437981	0.000140448	1.6797e-05	0
GB_597_1	UC_597_1	2024	15	NA	mild	14.71	9.11537	0.0747116	0.0227777	0.770551	0.0294089	0.0337584
GB_602_1	CD_602_1	2024	18	794.1	none	2.15	1.60139	0.0636286	0.00136494	0.0867149	0.00913505	0.00183377
GB_607_1	CD_607_1	2024	16	NA	mild	0.25	0.178763	0.000743296	0.000741576	0.0163236	0.0013052	0.00101987
GB_610_1	Control_610_1	2024	9	NA	none	0.01	0.329642	0.204654	0.0152844	0.109503	0.00133681	0
